# Supplementary material
Source: Springer Nature journal article supplement (https://www.springermedizin.de/resource/supplementary/12985_2008_484_MOESM3_ESM.pdf/9607852)

## Kinetics of virus accumulation in tomato plants

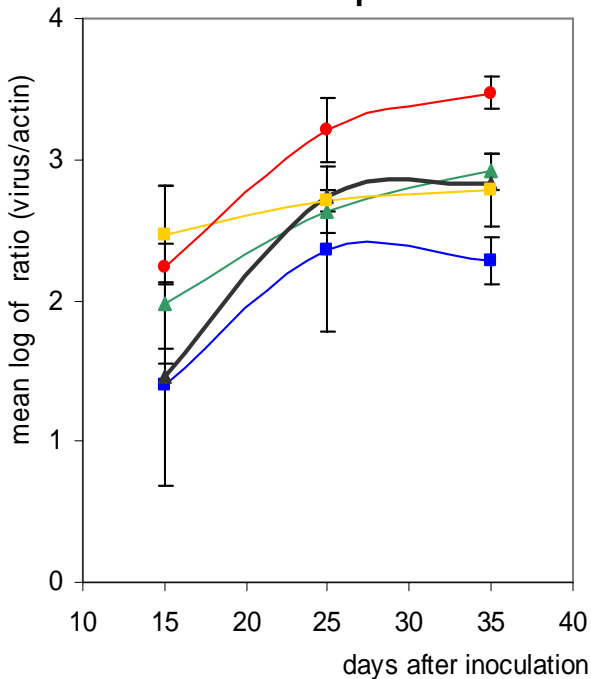

Supplement: MOESM3 [file 9607852]
